# Supplementary material for: A new oxygen-free cobalt-based compound SmCoAsF with multiple magnetic transitions
Source: Royal Society of Chemistry journal article supplement (doi:10.1039/d0ce00448k), 2020-01-01
Supplement: d0ce00448k1.pdf [file d0ce00448k1.pdf]

## A new oxygen-free cobalt-based compound SmCoAsF with multiple magnetic transitions

Dan Lin<sup>a</sup>, Qinxin Luo<sup>a</sup>, Hui Zheng<sup>a</sup>, Lulu Tang<sup>a</sup>, Wenqi Zhan<sup>a</sup> and Kaibin Tang<sup>a,b\*</sup>

<sup>a</sup> Department of Chemistry, University of Science and Technology of China, Hefei, 230026, People's Republic of China

<sup>b</sup> Hefei National Laboratory for Physical Sciences at Microscale, University of Science and Technology of China, Hefei, 230026, People's Republic of China

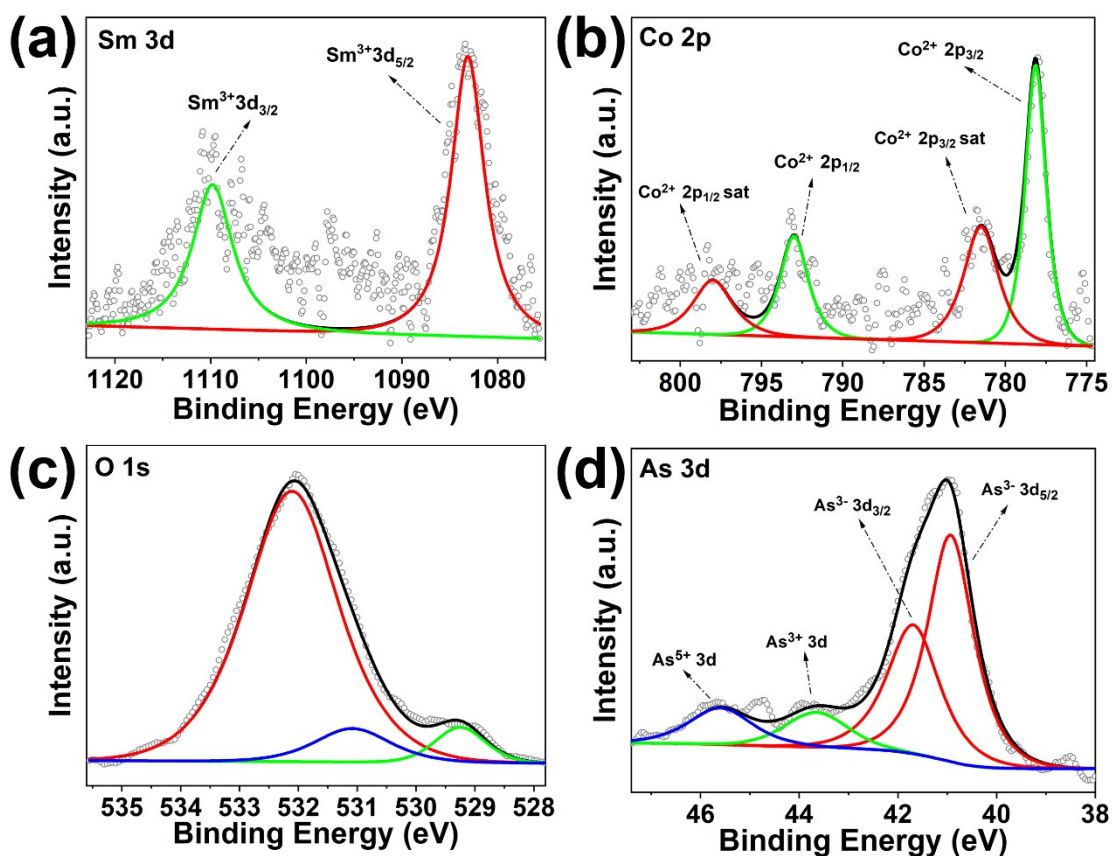

Fig. S1 XPS spectra for the (a) Sm 3d, (b) Co 2p, (c) O 1s and (d) As 3d of the as-synthesized sample SmCoAsF.
